# Supplementary material for: Carbon nanoflakes for energy storage: scalable and low-cost synthesis, excellent performances toward comprehensive application
Source: Royal Society of Chemistry journal article supplement (doi:10.1039/d2ta01163h), 2022-01-01
Supplement: d2ta01163h1.pdf [file d2ta01163h1.pdf]

## Supporting Information

### Carbon nanoflakes for energy storage: scalable and low-cost synthesis, excellent performances toward comprehensive application

Zongping Zhang<sup>a</sup>, Dongmei Zhang<sup>a</sup>, Cunyuan Pei<sup>a</sup>, Junlin Lu<sup>a</sup>, Tao Li<sup>b</sup>, Ting Xiao<sup>c</sup>,  
Shibing Ni<sup>a,\*</sup>

<sup>a</sup>College of Materials and Chemical Engineering, Key Laboratory of Inorganic Nonmetallic Crystalline and Energy Conversion Materials, China Three Gorges University, Yichang, 443002, China. E-mail: shibingni07@126.com.

<sup>b</sup>Analysis and Testing Center, China Three Gorges University, Yichang, 443002, China.

<sup>c</sup>College of Electrical Engineering & New Energy, China Three Gorges University, Yichang, 443002, China.

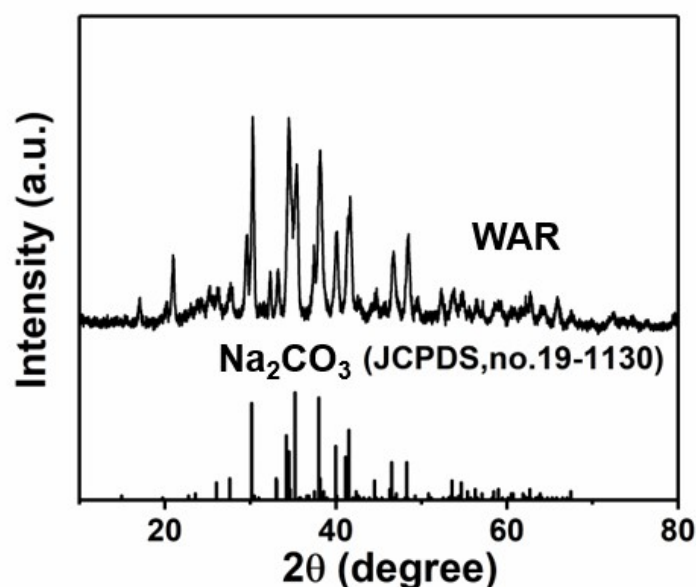

Fig. S1 XRD pattern of the sintered WAR.

Tab. S1 Price comparison of raw materials for different carbon precursors.

| Material        | Brand   | Weight/g | Price |
|-----------------|---------|----------|-------|
| Sodium citrate  | Aladdin | 500      | ¥148  |
| D-(+)-Glucose   | Aladdin | 500      | ¥69   |
| Sodium alginate | Aladdin | 500      | ¥307  |

|                 |                    |     |       |
|-----------------|--------------------|-----|-------|
| D-(-)-Fructose  | Aladdin            | 500 | ¥130  |
| Sodium chloride | Aladdin            | 500 | ¥243  |
| WAR             | LINYILVSEN Co.Ltd. | 500 | ¥22.5 |

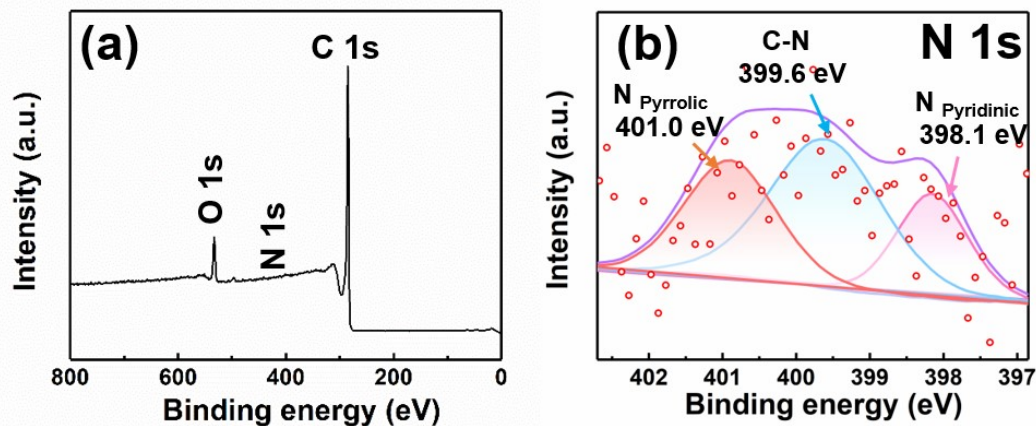

**Fig. S2** Survey XPS spectrum (a), high resolution XPS spectrum of N 1s (b) for the WAR-CNFs.

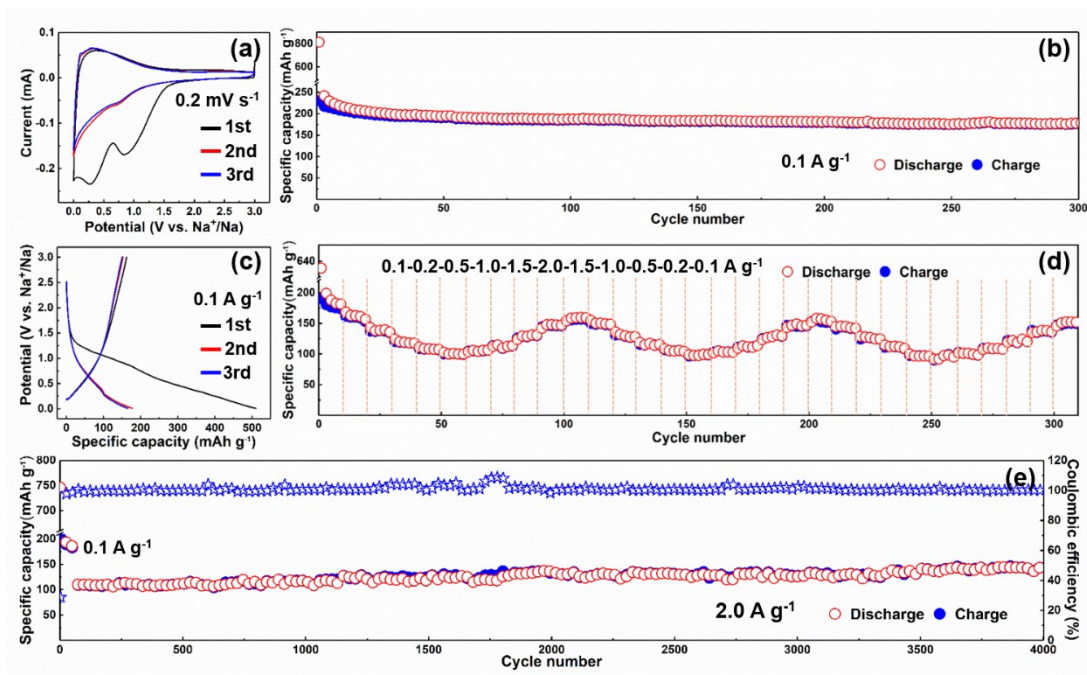

**Fig. S3** Electrochemical performance of the WAR-CNFs anode in Na ion storage. (a) Cyclic voltammogram curves at scan rate of 0.2 mV s<sup>-1</sup>. (b) Cycle performance at specific current of 0.1 A g<sup>-1</sup> and (c) the initial three charge/discharge curves. (d)

Capacity variation at various currents. (e) long-life performance at high current of 2.0

A g<sup>-1</sup>.

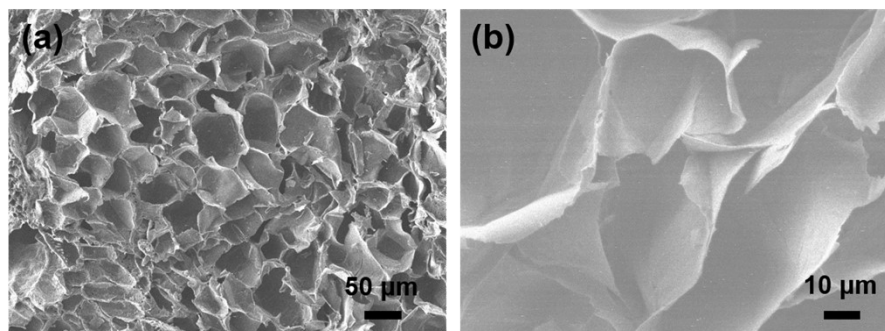

**Fig. S4** Morphological and microstructural information of the TTF-CNFs. (a) Low and (b) High magnification SEM images of TTF-CNFs.

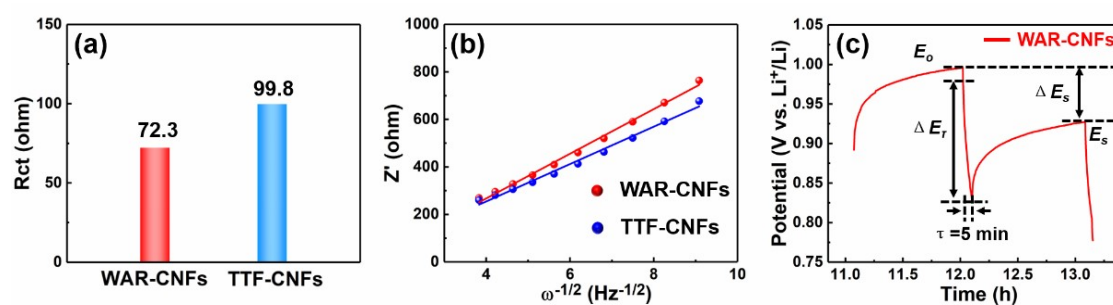

**Fig. S5** (a) Fitted  $R_{ct}$  and (b)  $Z'$  vs.  $\omega^{-1/2}$  of WAR-CNFs and TTF-CNFs electrodes after one cycle. (c) Typical profile in a single GITT test.

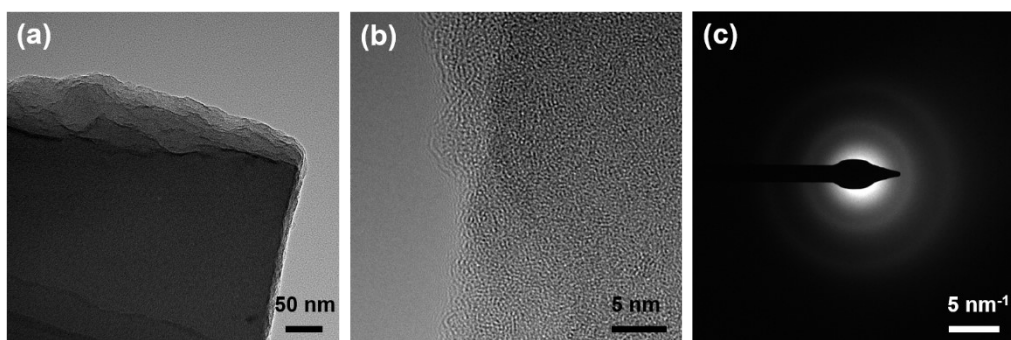

**Fig. S6** (a) Low and (b) High magnification TEM images. (c) SAED pattern of TTF-CNFs.

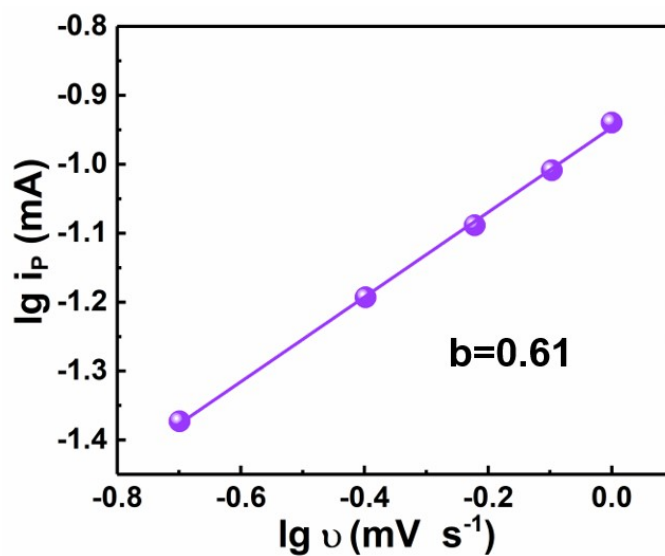

**Fig. S7** Relationship between  $\lg$  anodic peak current and  $\lg$  scan rate ( $b$  value) for the WAR-CNFs electrode after one cycle.

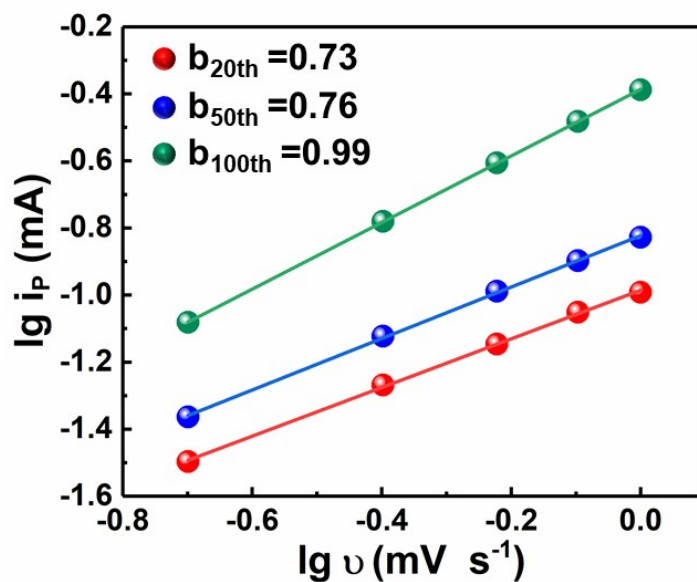

**Fig. S8** Relationship between  $\lg$  anodic peak current and  $\lg$  scan rate ( $b$  value) for the WAR-CNFs electrodes after 20 cycles, 50 cycles and 100 cycles.

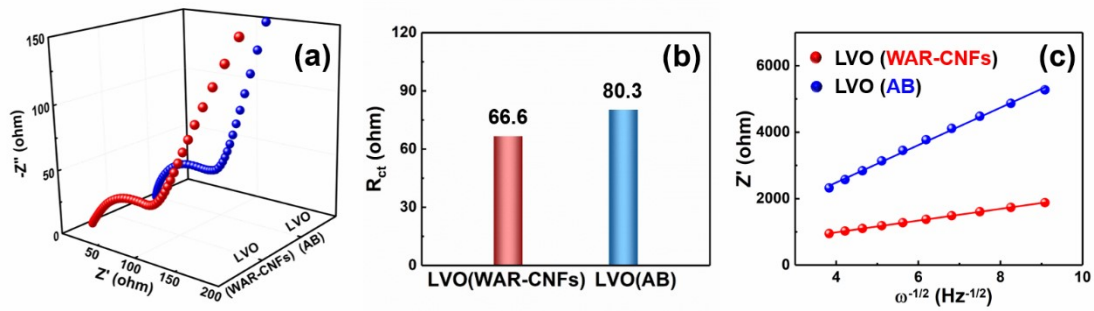

**Fig. S9** Reaction kinetics analysis of the LVO electrode with WAR-CNFs and AB additives, respectively. (a) EIS spectra, (b) Fitted  $R_{ct}$  and (c)  $Z'$  vs.  $\omega^{-1/2}$ .

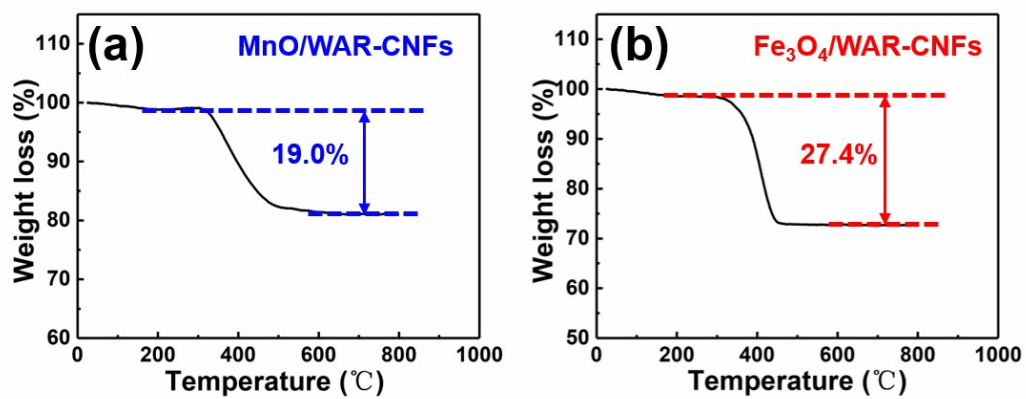

**Fig. S10** Thermal gravimetric analysis of the MnO/WAR-CNFs and Fe<sub>3</sub>O<sub>4</sub>/WAR-CNFs.
